# Supplementary material for: A Randomized Controlled Trial of Mindfulness, Goal Setting, and MiCBT for Smoking Cessation and Resilience in Low SES Smokers
Source: Research Square preprint supplement (doi:10.21203/rs.3.rs-8282925/v1), 2026-01-06

Suppl Figure 1: Internal composite at baseline, 3, 6, 9, 12 and 18 months


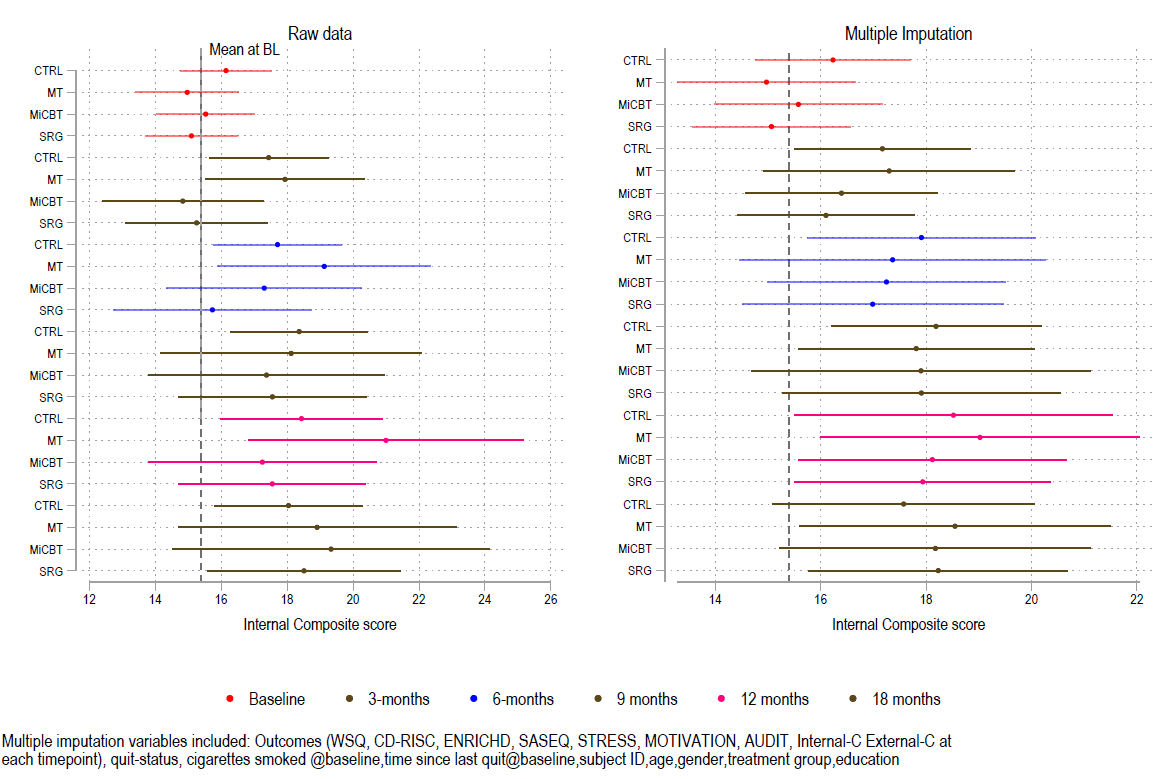


Suppl Figure 2: External composite at baseline, 3, 6, 9, 12 and 18 months


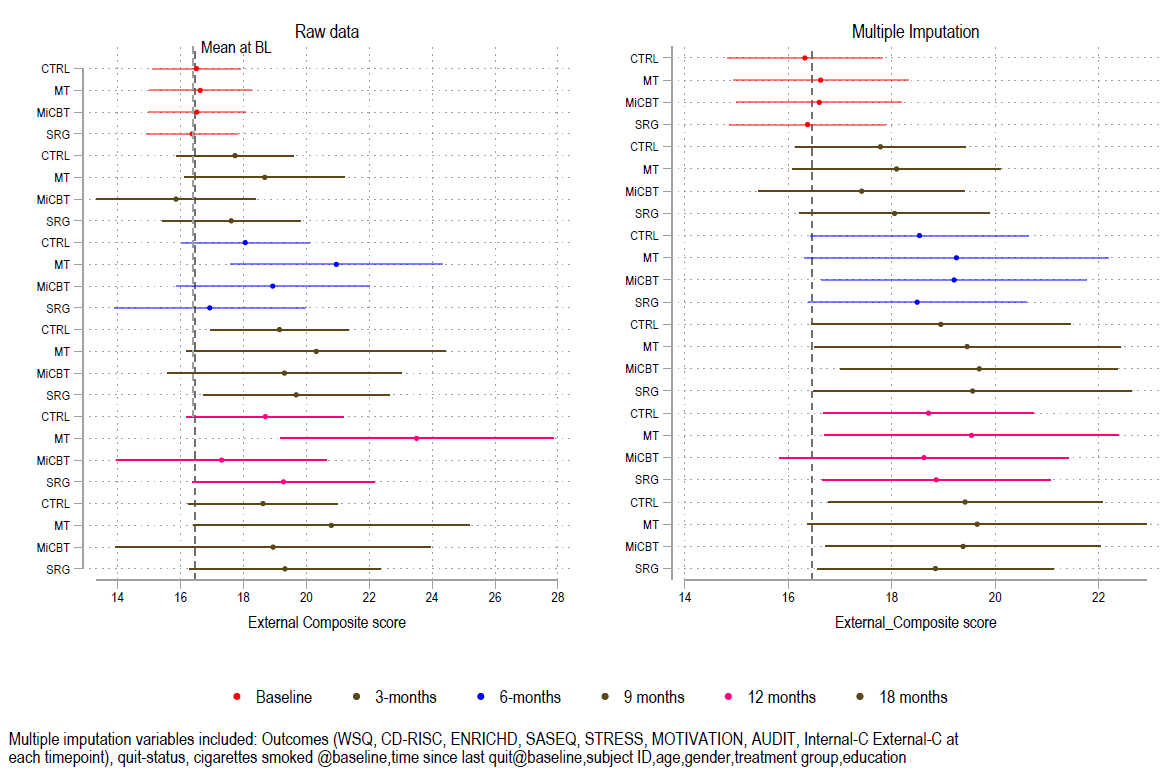


Suppl Figure 3: Equanimity at baseline, 2, 3 and 5 months


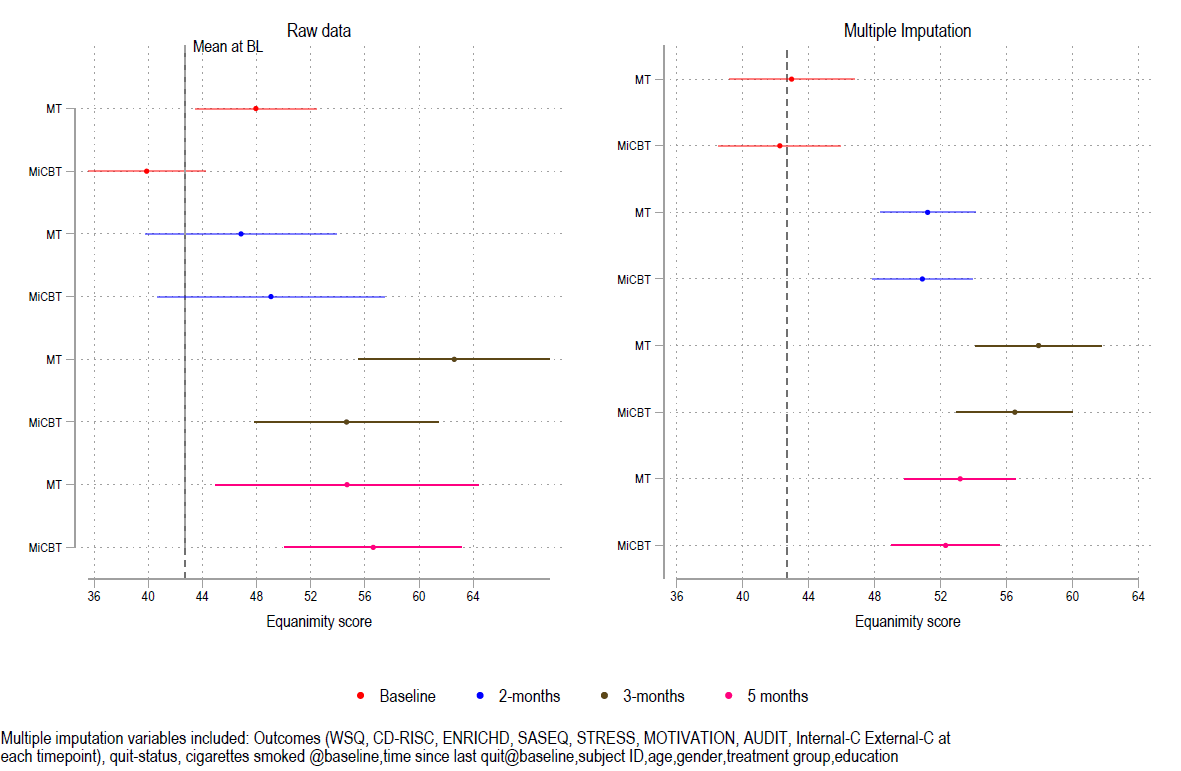


Suppl Figure 4: Motivation at baseline, 3, 6, 9, 12 and 18 months


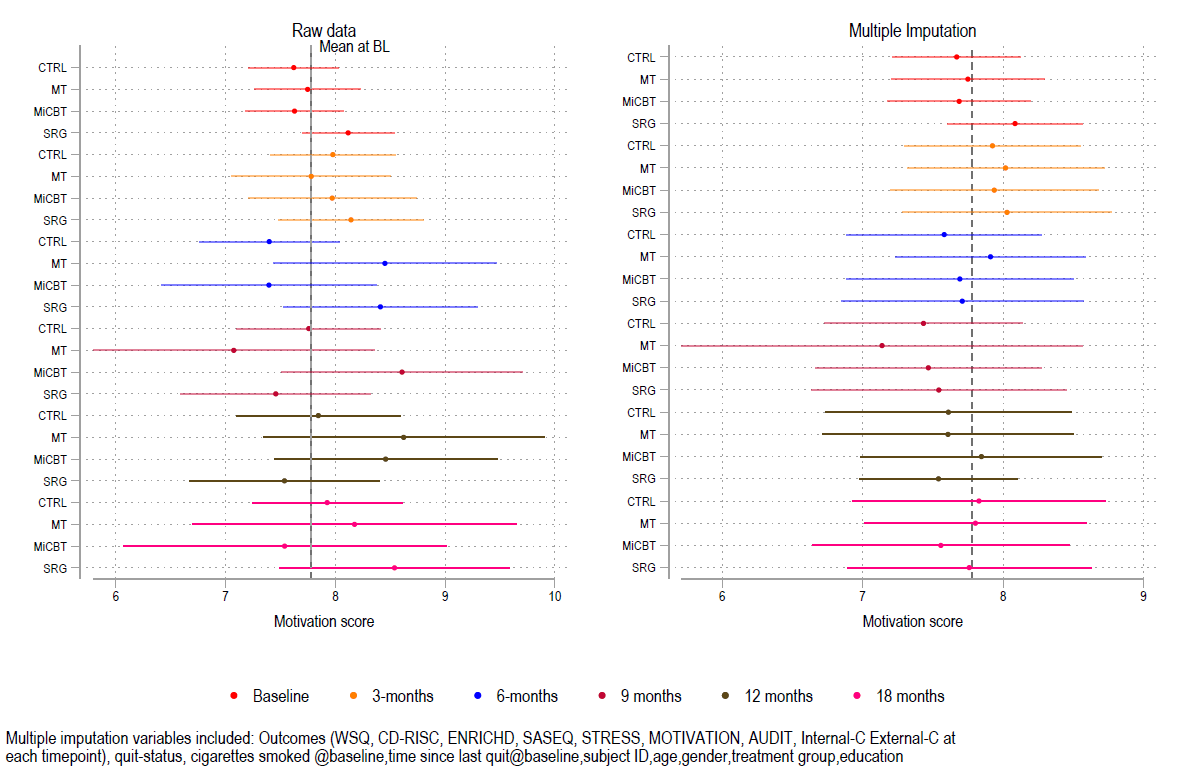


Suppl Figure 5: SEQ-12 at baseline, 3, 6, 9, 12 and 18 months


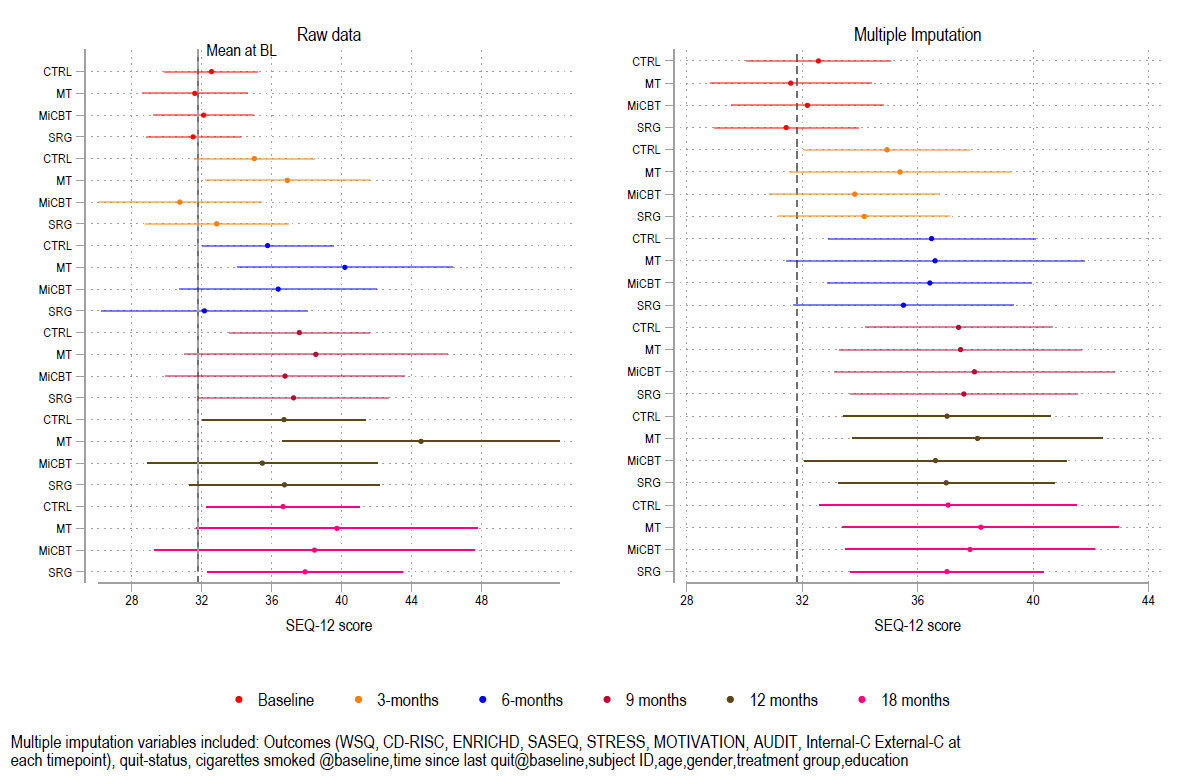


Suppl Figure 6:  STRESS at baseline, 3, 6, 9, 12 and 18 months


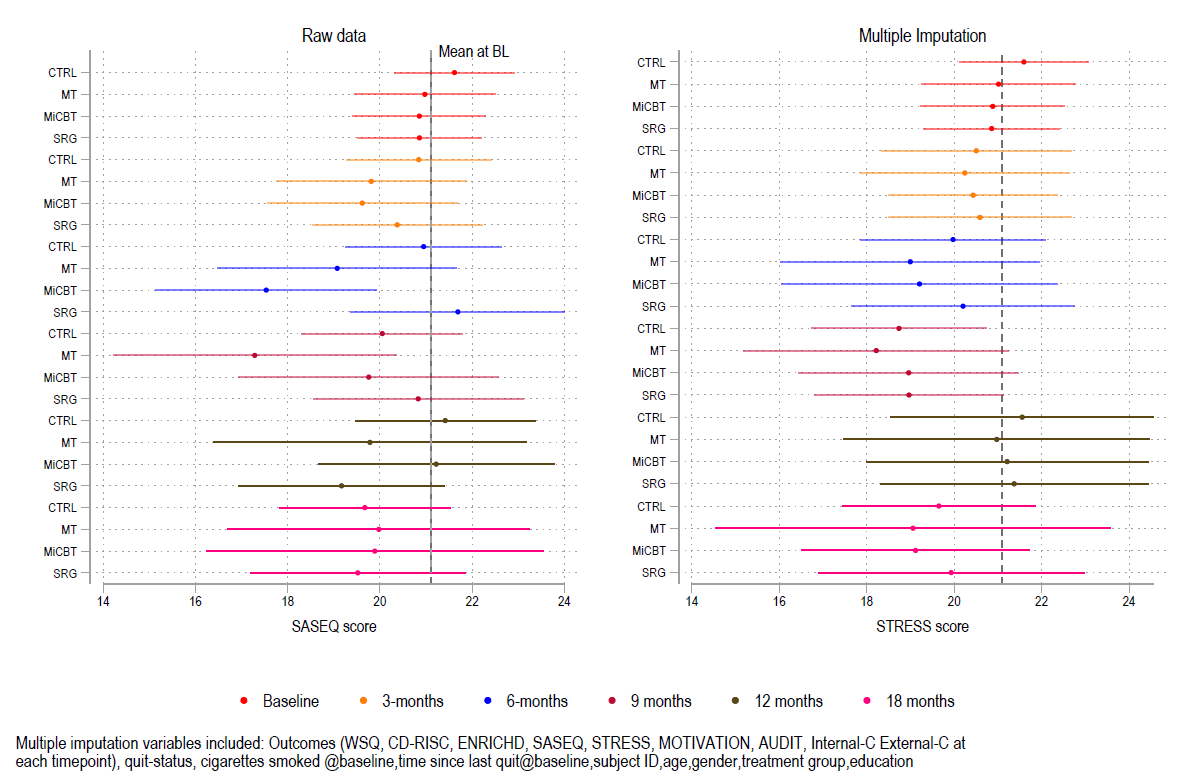


Suppl Figure 7: CD-RISC adjusted probability of smoking at 3, 6, 9, 12 and 18 months


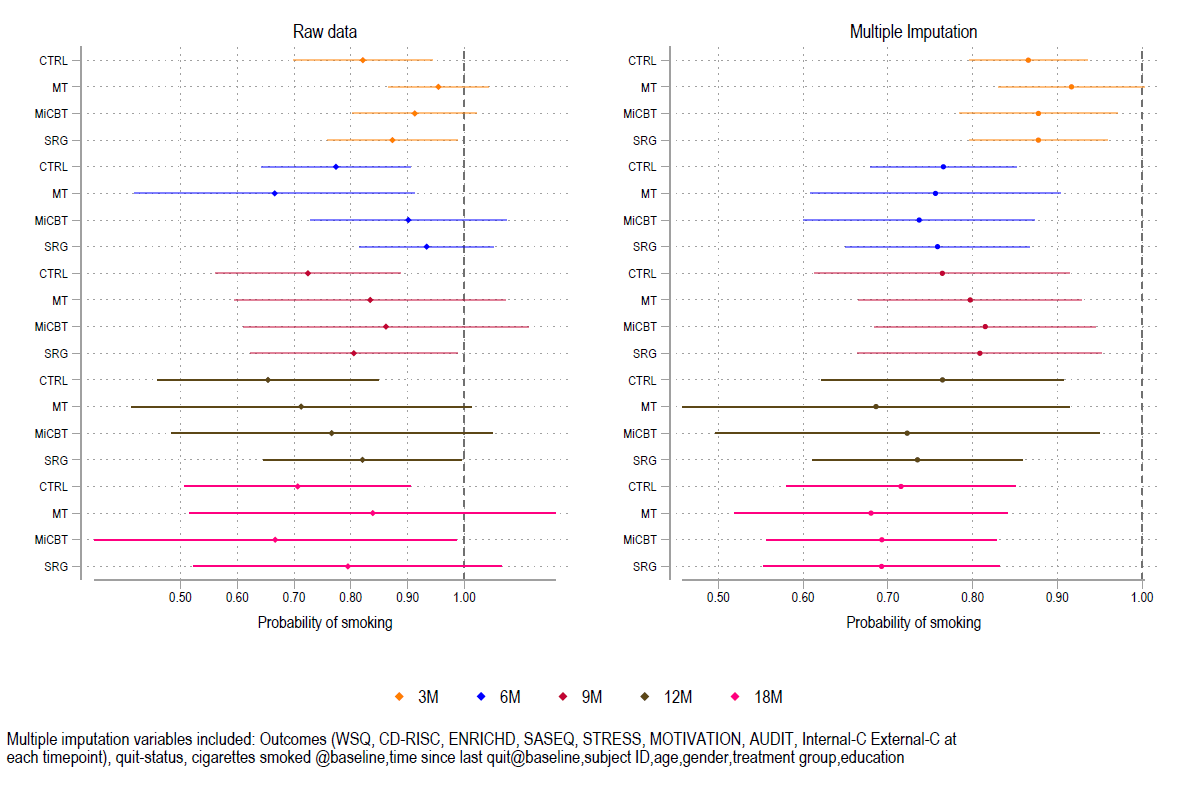


Suppl Figure 8: AUDIT at baseline, 6, 12 and 18 months


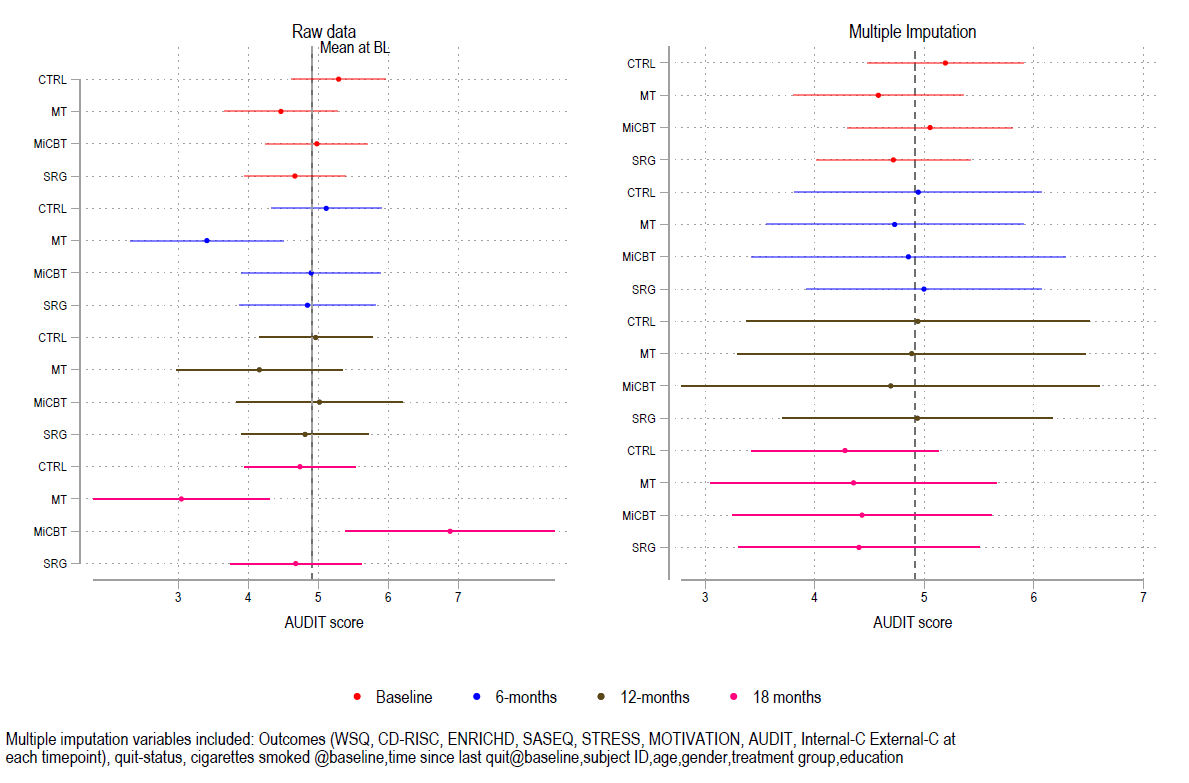

Supplement: Supplementary file 1 [file 5190c696c0223328b2ef7a7b.docx]
